# Supplementary material
Source: MDPI journal article supplement (https://www.mdpi.com/2073-4441/15/6/1023)

## Supplementary Files

For this study, spatial-explicit map calculations were made in ArcGIS Pro 2.4.3, using the projected coordinate system Palestine\_1923\_Palestine\_Grid. Shapefiles were converted to raster maps with a cell size of 25m (or larger, when the spatial resolution of input data was larger).

**Table S1.** Three suitability types for implementation of eyebrow terraces with olive trees analyzed in this study.

| Suitability types | Land use<br>base layer | Rainfall | Slope | AWC |
|-------------------|------------------------|----------|-------|-----|
| Rainfall & slope  | +                      | +        | +     |     |
| Rainfall & AWC    | +                      | +        |       | +   |
| AWC & slope       | +                      |          | +     | +   |

**Table S2.** Estimated olive yield for the three suitability zones in the West Bank (see Figure 2) for the business-as-usual (BAU) and terracing scenarios based on results from the crop-water balance models.

| Suitability zones | Scenario  | Olive yield reduction (%) | Olive yield (tonne/ha) |
|-------------------|-----------|---------------------------|------------------------|
| Rain & slope      | BAU       | 27.8                      | 1.75                   |
|                   | Terracing | 13.4                      | 2.09                   |
| Rain & AWC        | BAU       | 23.4                      | 1.85                   |
|                   | Terracing | 13.6                      | 2.09                   |
| Slope & AWC       | BAU       | 26.0                      | 1.79                   |
|                   | Terracing | 14.3                      | 2.07                   |

**Figure S1.** Curve number map of the West Bank [37].

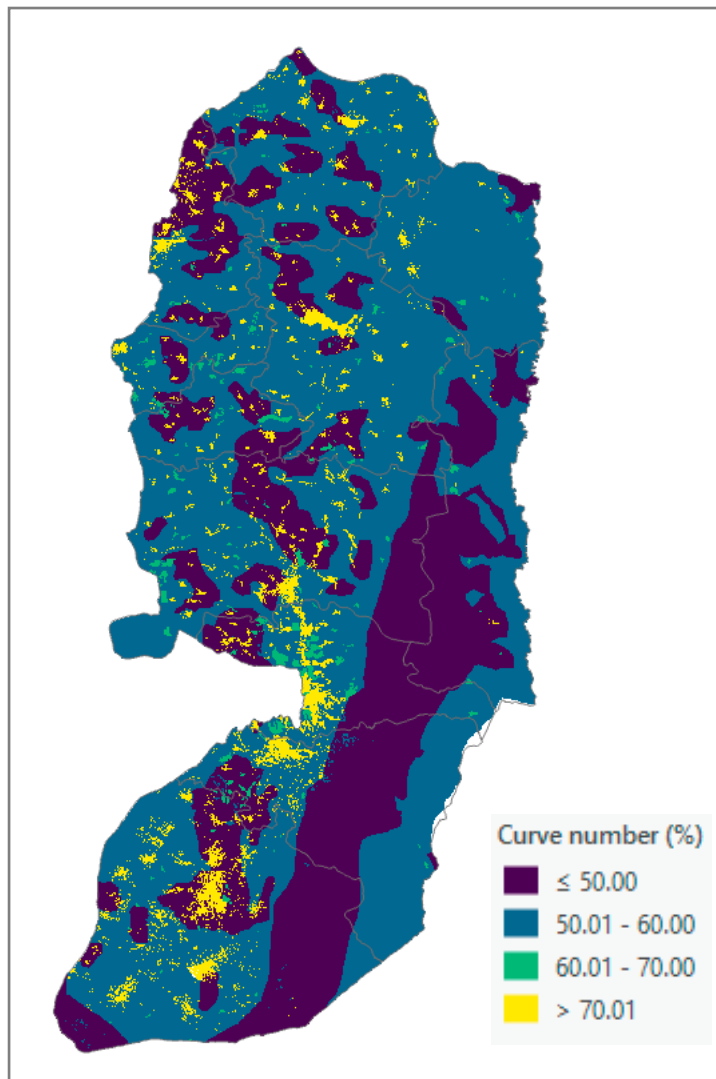

Supplement: s1 [file s1]
